# Supplementary material
Source: Elsevier journal article supplement (https://comptes-rendus.academie-sciences.fr/physique/article/10.1016/j.crhy.2011.06.009/file/attach/mmc1.pdf)
Supplement: mmc1 [file mmc1.pdf]

## Dans un laboratoire de nanosciences

Pascale Bayle-Guillemaud<sup>a</sup>, Emmanuel Hadji<sup>a</sup>, Peter Reiss<sup>b</sup>, Jacques Villain<sup>c</sup>

a. SP2M, UMR-E CEA / UJF-Grenoble 1, INAC, Grenoble, F-38054, France

b. SPPrAM, UMR CEA / CNRS / UJF-Grenoble 1, INAC, Grenoble, F-38054, France

c. Theory group, ESRF, B.P. 220, F-38043 Grenoble Cedex 9

### Résumé

*La fabrication, l'observation et la manipulation d'objets très petits est un tour de force, mais ces objets, susceptibles de s'infiltrer partout sans être perçus, peuvent susciter la méfiance. Pour mieux apprécier la situation, nous décrivons l'activité d'un institut de recherche spécialisé dans les nanosciences, certaines des méthodes qui y sont utilisées, l'esprit de ses chercheurs et leur attitude vis à vis des risques.*

### Introduction

Depuis le début de ce siècle la recherche a fortement évolué dans le domaine de la matière condensée, et les nanosciences sont apparues comme un nouveau champ de recherche. De nombreuses institutions s'y sont consacrées. C'est l'une d'entre elles, le campus MINATEC à Grenoble, que nous allons visiter dans le présent article. Que fait-on concrètement dans un tel complexe ? Comment arrive-t-on à fabriquer, à observer, à manipuler des objets aussi petits ? La chose est un peu mystérieuse pour beaucoup, y compris pour bien des physiciens. Il nous a donc semblé utile de demander à quelques spécialistes d'expliquer en termes simples comment ils font, quelles sont leurs finalités, et quelle place ont dans leur vie professionnelle les risques nouveaux liés à ces produits nouveaux.

Les chercheurs qui s'expriment ici appartiennent à trois laboratoires. Dans l'un de ces laboratoires on fabrique des nanoobjets par des méthodes physiques de croissance cristalline, telles que l'épitaxie par jets moléculaires. Dans le second, on fabrique des nanoobjets différents, en plus grande quantité, par des méthodes chimiques, en combinant des réactifs appropriés. Dans le troisième laboratoire, on observe les structures fabriquées, et éventuellement on les manipule. Ces exemples d'activités ne prétendent pas donner une description exhaustive des recherches en nanosciences, mais visent plutôt à donner une image vivante et concrète de celles-ci.

### Fabrication de nanoobjets par des méthodes physiques : cas des nanofils.

Les nanofils sont un exemple de nanoobjets fabriqués dans ces laboratoires. Ce sont des monocristaux dont le diamètre peut être de quelques dizaines de nanomètres alors que la longueur peut atteindre plusieurs micromètres. La figure 1, obtenue par microscopie électronique à balayage, montre comme les faces peuvent être parfaites, et le diamètre uniforme. Les lois de la tension superficielle sont responsables de cette perfection. Mais ces mêmes lois, qui tendent à minimiser la surface des solides, devraient s'opposer à la croissance d'objets filiformes. Comment de tels objets peuvent-ils alors être obtenus ? En simplifiant, nous dirons que les fils sont fabriqués par dépôt d'un matériau (adsorbat) sur la surface plane d'un autre matériau (substrat). Dans certains cas, le dépôt n'est possible que par l'intermédiaire d'un catalyseur, généralement de l'or. On dépose donc d'abord des gouttes d'or de taille nanométriques sur le substrat, puis on fait agir l'adsorbat sous forme gazeuse. Celui-ci ne se dépose que sous les gouttes d'or, sous forme de colonnes qui croissent, coiffées de leur chapiteau d'or (Fig. 1a). La taille (nanométrique) des gouttes détermine le diamètre des colonnes. La théorie du phénomène est décrite par Dubrovskii *et al.* [1].

On peut pourtant obtenir des nanofils d'oxyde de zinc (ZnO) sur saphir sans utiliser de catalyseur (Fig. 1c,d). Le phénomène, qui se produit dans des conditions assez précises (température de substrat, jets moléculaires d'intensité

bien définie) a été analysé par Périllat-Merceroz *et al.* [2] mais n'est pas totalement compris. On notera que le cristal de ZnO, contrairement à beaucoup de semi-conducteurs usuels, n'est pas cubique, mais hexagonal. La forme très anisotrope qu'on observe peut donc s'expliquer par une énergie de surface et/ou une vitesse de croissance plus faibles parallèlement à l'axe hexagonal que dans les directions perpendiculaires.

La réalisation de ces objets est déjà un exploit, mais ne constitue que la première étape d'un programme. L'étape suivante est de les comprendre, c'est-à-dire de mesurer leurs propriétés physiques (conductivité électrique, propriétés optiques etc.) qui sont différentes de celles d'un échantillon massif. Cela nécessite de savoir observer et manipuler les nanoobjets.

La manipulation est également nécessaire pour utiliser les nanoobjets, par exemple pour les intégrer dans des nano-dispositifs électroniques où leur finalité est de transporter, soit des électrons, soit des photons. La diminution de volume permet de faire des instruments plus perfectionnés en un volume donné, et aussi de réduire l'échauffement. Mais dans le laboratoire de recherche que nous visitons, la fabrication et l'étude des propriétés physiques passe avant les applications. Les connaissances qui résulteront de cette étude sont un préalable indispensable à l'élaboration d'applications technologiques, qui nécessiteront éventuellement d'adapter les modes de fabrication.

Figure 1 : a) Image obtenue par microscopie électronique à balayage (MEB) d'une forêt de nanofils de Si avec catalyseurs (au sommet) b) image avec la résolution atomique obtenue par microscopie électronique en transmission (MET) du bord d'un de ces nanofils c) et d) image MEB de nanofils de ZnO obtenus sans catalyseur sur du saphir. La Fig. 1a est due à Pascal Gentile (INAC/SP2M/SiNaPS) que nous remercions. La Fig. 1c est extraite de la réf. 2 avec l'aimable autorisation de l'éditeur et des auteurs. Fig. 1d est due à P.H. Jouneau, que nous remercions.

### Observation et déplacement de nanoobjets.

L'observation d'objets de taille nanométrique nécessite des instruments adaptés qui permettent de voir, compter et localiser ces objets. Le microscope électronique à balayage (MEB, en anglais SEM, Scanning Electron Microscope) tel que celui de la Figure 2, est l'instrument idéal qui, grâce à un faisceau d'électron balayant la surface, permet d'obtenir une image avec une résolution de l'ordre du nanomètre. Pour avoir une information plus détaillée (à l'échelle de l'atome c'est-à-dire 0.1nm) on utilise un microscope électronique à transmission comme celui de la figure 2 droite. Le microscope électronique, grâce à son pouvoir de résolution, va donc se substituer à l'œil du chercheur en nanoscience. Il permet ainsi de manipuler un nanofil, qu'on peut faire tomber, décrocher de sa surface, ou même déplacer sur un autre substrat pour une mesure. A défaut de pinces on utilise des nanomanipulateurs rudimentaires, qui peuvent être de simples pointes de dimension nanométrique pilotées par des composants piézoélectriques capables de leur dicter des mouvements très contrôlés.

Figure 2 : Un microscope électronique à balayage (a) et un microscope électronique à transmission de MINATEC (b). Images dues à Artechnique, CEA (a) et à P. Stroppa, CEA (b)

## Résonateurs

Bien que la réalisation de nanofils soit déjà un exploit, on sait fabriquer des micro-objets plus complexes. Nous citerons un exemple qui a une application bien définie. Il s'agit de micro-résonateurs optiques, objets capables de retenir sélectivement des photons d'une certaine longueur d'onde, à l'instar des cavités optiques macroscopiques telles que les Fabry-Pérot<sup>1</sup>. Il y a alors un renforcement local du champ électromagnétique par effet de résonance. Le facteur de qualité  $Q$  du dispositif<sup>2</sup> caractérise en quelque sorte le nombre de traversées de la cavité qu'un photon effectue dans les deux sens. Des nanorésonateurs de type Fabry-Pérot peuvent atteindre un rapport de qualité de l'ordre de 60 000 [3]. Pour faire mieux, il faut renoncer à la géométrie Fabry-Pérot et utiliser par exemple un résonateur dit à *mode de galerie*<sup>3</sup>. On peut ainsi faire des disques portés par des nanopiliers. Pour améliorer les performances de ces résonateurs, un recuit permet de transformer les disques en tores d'une remarquable perfection (Fig. 3). Les facteurs de qualité alors obtenus sont dans la gamme des  $10^7$ - $10^9$  ce qui représente les plus fortes valeurs jamais atteintes dans des microstructures optiques à ce jour.

Certes, ces dispositifs sont de dimension micrométrique et non nanométrique, mais la Fig. 3 suggère bien que la surface est exempte de défauts de taille nanométrique, qui sont à l'origine de la diffusion de la lumière et de la perte de qualité. La réalisation de bons dispositifs micrométriques implique la maîtrise des détails nanométriques et fait donc partie de la nanoscience.

Figure 3 : Une « whispering gallery » vue par microscopie électronique à balayage. Le tore a été « poli » par recuit. Cette image est due à Jean Baptiste Jager (INAC/SP2M/SiNaPS) que nous remercions.

## Fabrication de nanoobjets par voie chimique.

La voie chimique permet de préparer des nanoobjets en grande quantité sous forme de colloïdes en solution. En injectant assez rapidement les réactifs appropriés dans un solvant chauffé, on provoque une nucléation rapide suivie par la croissance des particules. On peut ainsi obtenir des nanobilles de quelques nanomètres de diamètre constituées de quelques centaines à plusieurs milliers d'atomes, à vocation de « boîtes quantiques » (des objets dans lesquels les porteurs de charge sont confinés dans les trois dimensions d'espace). Elles seront constituées par exemple d'un semi-conducteur II-VI tel que le CdSe, III-V tel que l'InP ou I-III-VI tel que le CuInS<sub>2</sub> sur lequel les molécules d'un surfactant approprié (molécule amphiphile avec une tête polaire et une queue apolaire) viennent se lier [4]. Leur rôle est d'empêcher l'agrégation des nanoparticules tout en leur laissant la possibilité de croître à température élevée.

---

<sup>1</sup> Le terme « Fabry-Pérot » correspond ici à la géométrie (un milieu transparent entre deux miroirs) qui est commune au micro-résonateur et à l'interféromètre construit par Fabry et Pérot ; le milieu transparent est différent, son épaisseur est différente et l'usage est différent.

<sup>2</sup> Défini comme le rapport  $Q=\lambda/\Delta\lambda$ , où  $\lambda$  est la longueur d'onde et  $\Delta\lambda$  la largeur de la résonance.

<sup>3</sup> En anglais ce dispositif est appelé « whispering gallery » du nom de la galerie circulaire à la base du dôme de la cathédrale Saint-Paul de Londres, ainsi nommé parce que si l'on chuchote face au mur d'un côté de cette galerie, quelqu'un qui se tient de l'autre côté peut comprendre, car le son se propage parfaitement le long du dôme.

Pour protéger le coeur en CdSe, InP ou CuInS<sub>2</sub>, on peut l'envelopper d'une coquille inorganique, par exemple en sulfure de zinc ZnS (Figure 4 d).

Figure 4 : Nanocristaux de CuInS<sub>2</sub>/ZnS d'environ 2 nm (jaune) à 4 nm (rouge) de diamètre. a) Lumière ambiante ; b) sous lumière UV ; c) image de microscopie électronique en transmission à haute résolution. d) Structure d'un nanocristal cœur/coquille.

Le diamètre peut être ajusté avec une assez bonne précision en réglant les conditions de synthèse (température, nature et concentration des réactifs et surfactants,...) et on peut ainsi obtenir des suspensions dont la couleur dépend de la taille des particules un peu comme la hauteur d'un son dépend de la taille de la cavité (Fig. 4 a/b). La photoluminescence donne des informations sur la taille moyenne (par la position de la raie) et sur la dispersion des tailles (par la largeur de la raie).<sup>4</sup>

De telles boîtes quantiques à structure cœur/coquille ont, si on les compare aux colorants organiques, une excellente photostabilité, c'est-à-dire que leurs propriétés d'émission et d'absorption s'altèrent beaucoup moins vite à l'air sous l'effet de la lumière. Leur efficacité de fluorescence exprimée par le rendement quantique peut être supérieure à 50%.

La structure des nanocristaux cœur/coquille peut être déterminée par microscopie électronique à transmission (Fig. 4c) qui permet d'analyser la composition chimique d'objets minces par spectroscopie électronique à perte d'énergie (EELS).

#### Le chercheur et les applications.

Les objets que nous décrivons ici sont voués à avoir des applications, mais celles-ci, pour la plupart, n'ont pas atteint le stade industriel. Ainsi, les résonateurs décrits plus haut ne sont pas actuellement utilisés dans les instruments de notre vie courante. En les utilisant en émission stimulée, on pourrait certes en faire des lasers, mais les lasers qui lisent nos disques compacts ne sont pas de dimension nanométrique. Pour les chercheurs qui s'expriment dans cet article, le souci immédiat est de concevoir et fabriquer des objets nouveaux, puis d'étudier leurs propriétés physiques. Ils pensent que de tels travaux constituent les germes qui permettront la genèse de nouvelles applications utiles.

---

<sup>4</sup>La couleur émise correspond à un photon dont l'énergie est celle d'un exciton, donc proche du gap du semi-conducteur. Ce gap dépend de la taille des particules, à cause du confinement quantique : quand la taille est du même ordre de grandeur que la longueur d'onde associée aux électrons, l'énergie du gap augmente d'autant plus que le rayon du nanocristal est faible [5].

D'autres objets technologiques qui appellent la nanotechnologie sont les piles à combustibles. Ces dispositifs produisent de l'énergie électrique par combustion. Quand on exploite la combustion pour produire de l'énergie mécanique ou électrique, la méthode usuelle utilise une machine thermique, dont le rendement est limité par le principe de Carnot. Les piles à combustible échappent au principe de Carnot. Mais elles nécessitent un catalyseur fort cher (du platine), et dont la vie n'est pas très longue. En donnant au catalyseur des dimensions aussi petites que possible (donc nanométriques), on peut espérer l'économiser. D'autre part, en étudiant les propriétés des nanoparticules de platine au microscope électronique, on peut envisager la possibilité de trouver des moyens de prolonger la vie du catalyseur.

La production photovoltaïque d'électricité est également une application potentielle des nanoparticules. La voie photovoltaïque est prometteuse pour les pays pauvres en matières premières comme l'Europe, mais pour l'instant plus chère que les autres procédés de production d'énergie. Les nanoparticules de semi-conducteurs, par exemple, enrobées dans certains polymères conjugués<sup>5</sup>, par exemple le poly(3-hexylthiophène), sont une issue possible à cette situation [6] : ces matériaux « hybrides » peuvent être fabriqués à faible coût et déposés sur des grandes surfaces, même flexibles. Les nanoparticules assurent dans ce cas une meilleure absorption de la lumière par les cellules solaires. La tomographie électronique, une variante de la microscopie électronique en transmission, permet de contrôler la structure des matériaux hybrides en trois dimensions. La répartition homogène des nanocristaux dans la matrice polymère est très importante pour le bon fonctionnement de la cellule solaire.

Finalement la génération de la lumière blanche en combinant des nanocristaux émettant dans le bleu, le vert et le rouge, est également envisagée afin d'obtenir un teint plus chaleureux et un meilleur rendu de couleurs que les LEDs actuelles.

#### Le chercheur et la sécurité.

Les nanoparticules ont une activité chimique particulièrement forte<sup>6</sup>. C'est ce qui leur donne un intérêt pour la catalyse. Cela peut aussi en faire des toxiques ; ainsi les nanoparticules d'argent, utilisées comme bactéricides, ne sont peut-être pas sans danger pour l'homme [7]. Un autre cas est celui des nanotubes de carbone, soupçonnés de présenter des risques analogues à ceux des fibres d'amiante. Ces objets ne sont pas présents dans le laboratoire que nous visitons aujourd'hui. Par contre les nanoparticules de CdSe qui y sont fabriquées sont dangereuses, ne serait-ce que parce que les deux composants, même à l'état massif, sont toxiques. Les nanoparticules notoirement ou potentiellement toxiques sont traitées spécifiquement dans les laboratoires. Il y a ainsi un « risque nano » comme il y a un risque chimique lié aux produits manipulés dans les laboratoires.

Le risque est une chose familière pour un chercheur expérimentateur. Le risque chimique, lié notamment aux acides et aux solvants organiques, est probablement le plus uniformément présent. Dans un grand organisme de recherche, les risques professionnels sont identifiés et évalués par des spécialistes (notamment des médecins) ; à l'issue de cette évaluation des règles de protection sont définies par la direction, et les chercheurs se conforment à ces règles. Au Commissariat à l'Energie Atomique et aux Energies Alternatives, dont dépend le laboratoire que nous visitons, cela se fait sous le contrôle d'un Ingénieur de Sécurité (un par département, dont la sécurité est la tâche exclusive) et du Comité d'hygiène et sécurité (un par établissement). Ce contrôle se fait ici dans un climat de confiance mutuelle propice à une recherche efficace. Il est clair que l'intérêt des chercheurs est que le risque soit aussi faible que

---

<sup>5</sup> Ces polymères sont à l'état neutre (non dopé) des semi-conducteurs organiques grâce à leur caractéristique d'être conjugués c'est-à-dire que leur chaîne principale comporte alternativement des liaisons simples et doubles.

<sup>6</sup> Liée à la grande proportion d'atomes situés en surface, et notamment sur des arêtes ou sur des pointes.

possible. Toutefois, des contrôles systématiques ont lieu. Les mesures qui ont été faites dans les laboratoires que nous visitons n'ont pas mis en évidence de contamination par des nano-particules.

Il est vrai que les laboratoires que nous avons choisi de présenter ne sont pas parmi les plus exposés. En effet, les objets étudiés sont présents en très faible quantité et généralement accrochés à un substrat ou support de dimension millimétrique : les nanofils sont accrochés au substrat sur lequel ils ont poussé, alors que les nanoparticules fabriquées par voie chimique ne sont pas volatiles (à cause de l'enrobage organique) et leur inhalation n'est donc pas à redouter. Vis-à-vis du risque nano, les moyens de protection mis en œuvre sont suivant les besoins des masques, des hottes aspirantes, des boîtes à gants, ou encore des poubelles spécifiques et des filières appropriées de collecte des déchets.

Qu'advient-il le jour où les nanoparticules sortiront du laboratoire pour être mises en œuvre dans un produit ? Il sera alors nécessaire d'évaluer à nouveau les risques qui pourraient ou non apparaître selon la mise en œuvre et l'usage qui sera fait de ces nanoobjets. La relation de l'utilisateur avec un produit est en effet bien différente de la relation du chercheur, prêt à s'abriter derrière des masques et des hottes, avec le même produit.

### Conclusion

La nanoscience est une grande conquête de la fin du vingtième siècle et du début du vingt et unième. Fabriquer, observer et manipuler des objets dont les dimensions ne sont pas beaucoup plus grandes que celles d'un atome, c'est une prouesse qui enthousiasme les chercheurs. Les perspectives d'applications sont très importantes, mais le moteur premier des chercheurs qui s'expriment ici est le désir de faire avancer les connaissances. La prise en compte des risques nano se fait en conciliant efficacité et sécurité.

## Appendice. La microscopie électronique

La microscopie électronique à balayage s'est introduite dans les laboratoires à partir de 1965. Elle utilise des électrons de 1 à 40 keV. Sa résolution peut atteindre le nanomètre. Elle est donc moins bonne que celle du microscope à effet tunnel, mais sa profondeur de champ est incomparablement plus grande (figures 1 et 3).

La microscopie électronique à transmission s'est développée en Allemagne avant et après la deuxième guerre mondiale. Elle requiert des échantillons très minces, d'épaisseur inférieure au micromètre. Elle est donc particulièrement adaptée à l'observation d'objets nanométriques. Un microscope à transmission conçu de façon appropriée permet de faire de la spectroscopie de perte d'énergie, et ainsi l'analyse chimique d'un matériau. La perte d'énergie mesure en effet l'énergie nécessaire à arracher un électron d'une couche profonde, ce qui est une caractéristique connue de chaque atome.

Outre la spectroscopie de perte d'énergie, des usages particuliers du microscope électronique sont l'holographie électronique et l'imagerie à l'échelle atomique.

## BIBLIOGRAPHIE

1. V. G. Dubrovskii, N. V. Sibirev, G. E. Cirlin, J. C. Harmand, V. M. Ustinov, *Theoretical analysis of the vapor-liquid-solid mechanism of nanowire growth during molecular beam epitaxy*, Phys. Rev. E **73** (2006) 021603.
2. G. Perillat-Merceroz, P.H. Jouneau, G. Feuillet, R. Thierry, M. Rosina, P. Ferret, *MOCVD growth mechanisms of ZnO nanorods*, Journal of Physics: Conference Series 209 (2010) 012034
3. P. Velha, E. Picard, T. Charvolin, E. Hadji, J. C. Rodier, P. Lalanne, D. Peyrade, *Ultra-High Q/V Fabry-Perot microcavity on SOI substrate*, Optics Express **15** (2007) 16090.
4. L. Li, T. Jean Daou, I. Texier, T. T. K. Chi, N. Q. Liem, P. Reiss, *Highly Luminescent CuInS<sub>2</sub>/ZnS Core/Shell Nanocrystals: Cadmium-Free Quantum Dots for In Vivo Imaging*, Chem. Mater. **21** (2009) 2422.
5. L. E. Brus, *Electron-electron and Electron-Hole Interactions in Small Semiconductor Crystallites: The Size Dependence of the Lowest Excited Electronic State*, J. Chem. Phys. **80** (1984) 4403.
6. T. Jiu, P. Reiss, S. Guillerez, R. De Bettignies, S. Bailly, F. Chandezon, *Hybrid Solar Cells Based on Blends of CdSe Nanorods and Poly(3-alkylthiophene) Nanofibers*, IEEE J. Sel. Top. Quant. Electr. **16** (2010) 1619.
7. R. Senjen & I. Illuminato (2009) *Nano and biocidal silver. Report of F.O.E.* [http://altered-states.net/barry/newsletter408/FoE\\_nanosilver\\_report\\_textonly.pdf](http://altered-states.net/barry/newsletter408/FoE_nanosilver_report_textonly.pdf). Voir aussi la contribution d'E. Gaffet au présent dossier
